# Supplementary material for: Simultaneous Effects of Carboxyl Group-Containing Hyperbranched Polymers on Glass Fiber-Reinforced Polyamide 6/Hollow Glass Microsphere Syntactic Foams
Source: MDPI journal article supplement (doi:10.3390/polym14091915), 2022-05-07
Supplement: s1 [file s1]

# Supplementary Materials

## **Simultaneous effect of carboxyl group-containing hyperbranched polymer on the glass fiber-reinforced polyamide 6/hollow glass microsphere syntactic foams**

Jincheol Kim<sup>1, †</sup>, Jaewon Lee<sup>1, †</sup>, Sosan Hwang<sup>1</sup>, Kyungjun Park<sup>1</sup>, Sanghyun Hong<sup>2</sup>, Seojin Lee<sup>2</sup>, Sang Eun Shim<sup>1,\*</sup>, and Yingjie Qian<sup>1,\*</sup>

<sup>1</sup> Department of Chemistry and Chemical Engineering, Education and Research Center for Smart Energy and Materials, Inha University, Incheon 22212, Republic of Korea

<sup>2</sup> H&A R&D Center, LG Electronics., LTD, 51 Gasan digital 1-ro, Geumcheon-gu, Seoul, 153802, Korea

<sup>†</sup> These authors contributed equally to this work.

*\*Corresponding author. E-mail address:* seshim@inha.ac.kr for SE Shim, yjqian@inha.ac.kr for Y Qian

**Table S1.** DSC data for syntactic foams and a glass fiber reinforced PA 6 composite under non-isothermal crystallization.

| Sample code | $T_m$<br>(°C) | $\Delta H_f$<br>(J/g) | $X_c$<br>(%) | $T_c$<br>(°C) | $T_{onset}$<br>(°C) | $\Delta H_c$<br>(J/g) | $\Delta H_c^*$<br>(J/g) |
|-------------|---------------|-----------------------|--------------|---------------|---------------------|-----------------------|-------------------------|
| PA 6        | 221.3         | 47.95                 | 19.98        | 192.5         | 196.3               | 55.46                 | 55.46                   |
| PA 6/HGM 5  | 221.5         | 45.92                 | 20.36        | 191.7         | 195.8               | 51.11                 | 54.39                   |
| PA 6/HGM 20 | 222.1         | 41.94                 | 21.63        | 190.3         | 195.0               | 46.24                 | 57.23                   |
| PA 6/GF 5   | 221.4         | 47.77                 | 21.23        | 192.3         | 196.2               | 54.25                 | 57.86                   |

**Table S2.** Crystallization kinetic analysis of non-isothermal crystallization data for syntactic foams and a glass fiber reinforced composite.

| Sample code | n   | $Z_t$ | $Z_c$ | $t_{1/2}$<br>(min) | Adj. R-Square |
|-------------|-----|-------|-------|--------------------|---------------|
| PA 6        | 3.5 | 1.981 | 1.071 | 0.74               | 0.9996        |
| PA 6/HGM 5  | 3.4 | 1.904 | 1.066 | 0.74               | 0.9998        |
| PA 6/HGM 20 | 3.4 | 1.365 | 1.032 | 0.82               | 0.9999        |
| PA 6/GF 5   | 3.6 | 1.871 | 1.065 | 0.76               | 0.9997        |

**Table S3.** Comparison of the mechanical properties of neat PA 6, syntactic foams, and a glass fiber reinforced PA 6 composite.

| Sample code | Specific gravity | Tensile strength (MPa) | Elongation (%)  | Flexural modulus (MPa) | Flexural strength (MPa) |
|-------------|------------------|------------------------|-----------------|------------------------|-------------------------|
| PA 6        | 1.125            | 80.2 $\pm$ 2.6         | 13.6 $\pm$ 13.8 | 2843 $\pm$ 73          | 35.3 $\pm$ 0.9          |
| PA 6/HGM 5  | 1.063            | 67.8 $\pm$ 1.3         | 8.4 $\pm$ 6.1   | 3023 $\pm$ 68          | 37.5 $\pm$ 0.8          |
| PA 6/HGM 10 | 1.018            | 62.9 $\pm$ 1.2         | 3.3 $\pm$ 0.8   | 3215 $\pm$ 28          | 39.9 $\pm$ 0.3          |
| PA 6/HGM 15 | 0.983            | 52.8 $\pm$ 1.5         | 2.1 $\pm$ 1.8   | 3360 $\pm$ 23          | 41.7 $\pm$ 0.3          |
| PA 6/HGM 20 | 0.940            | 47.6 $\pm$ 2.3         | 1.6 $\pm$ 0.4   | 3343 $\pm$ 46          | 41.5 $\pm$ 0.6          |
| PA 6/GF 5   | 1.167            | 90.4 $\pm$ 4.1         | 3.2 $\pm$ 1.6   | 3371 $\pm$ 74          | 41.8 $\pm$ 0.9          |

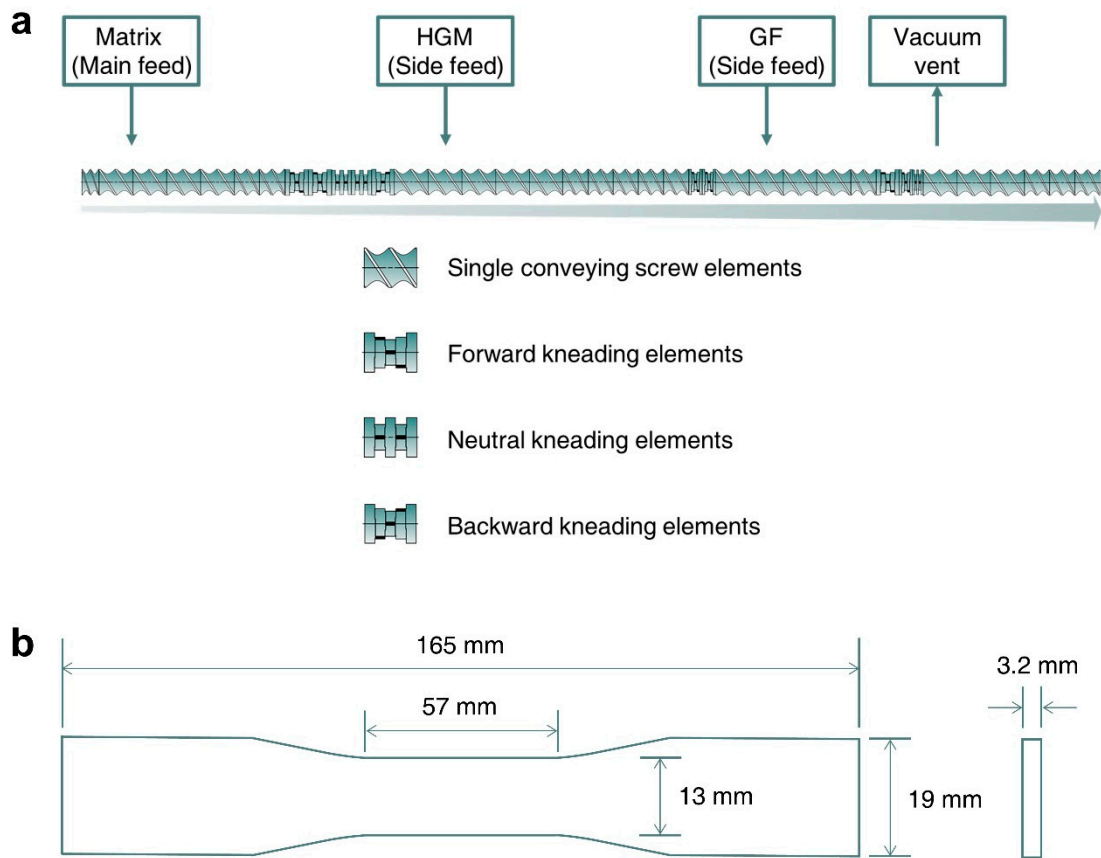

**Figure S1.** (a) Twin-screw configuration representing extrusion process starting from left to right. HGMs and GFs are side-fed in the middle. (b) Tensile test specimen dimension in accordance with ASTM D638 Type I standard. Gauge length of the specimen is 50 mm

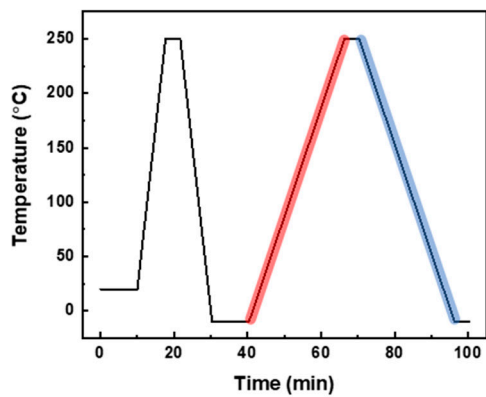

|         |                                            |
|---------|--------------------------------------------|
| #SEG. 1 | Isothermal at 20°C for 10 min              |
| #SEG. 2 | Heating at 30 °C/min from 20 °C to 250 °C  |
| #SEG. 3 | Isothermal at 250°C for 4 min              |
| #SEG. 4 | Cooling at 30 °C/min from 250 °C to -10 °C |
| #SEG. 5 | Isothermal at -10°C for 10 min             |
| #SEG. 6 | Heating at 10 °C/min from -10 °C to 250 °C |
| #SEG. 7 | Isothermal at 250°C for 4 min              |
| #SEG. 8 | Cooling at 10 °C/min from 250 °C to -10 °C |
| #SEG. 9 | Isothermal at -10°C for 4 min              |

**Figure S2.** DSC profile to figure out the effect of HBP contents within RSF samples on non-isothermal crystallization behavior. Data was collected through Segment 6 on heating cycle to measure and calculate  $T_m$ ,  $\Delta H_f$ , and  $X_c$ . Segment 8 was implemented on cooling cycle to measure and calculate  $T_c$ ,  $T_{onset}$ ,  $\Delta H_c$ , and  $\Delta H_c^*$ .

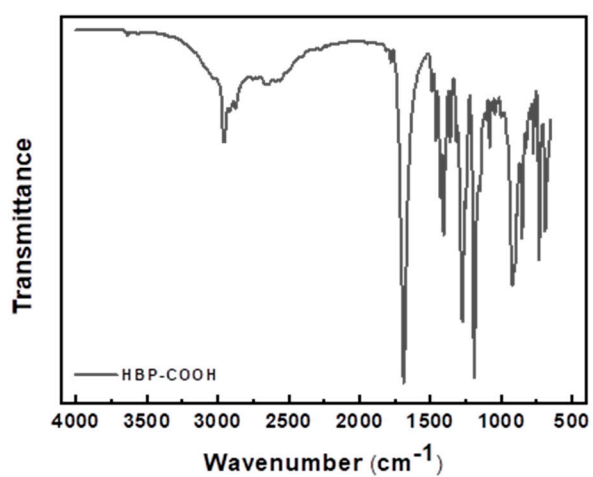

**Figure S3.** FT-IR spectra of HBP. OH stretching in the carboxyl group is 2952 cm<sup>-1</sup> and aliphatic O-H bending is 1427cm<sup>-1</sup>. Aliphatic ester group of C-O stretching is 1191 cm<sup>-1</sup> and aliphatic ether group of C-O stretching is 1149 cm<sup>-1</sup>.

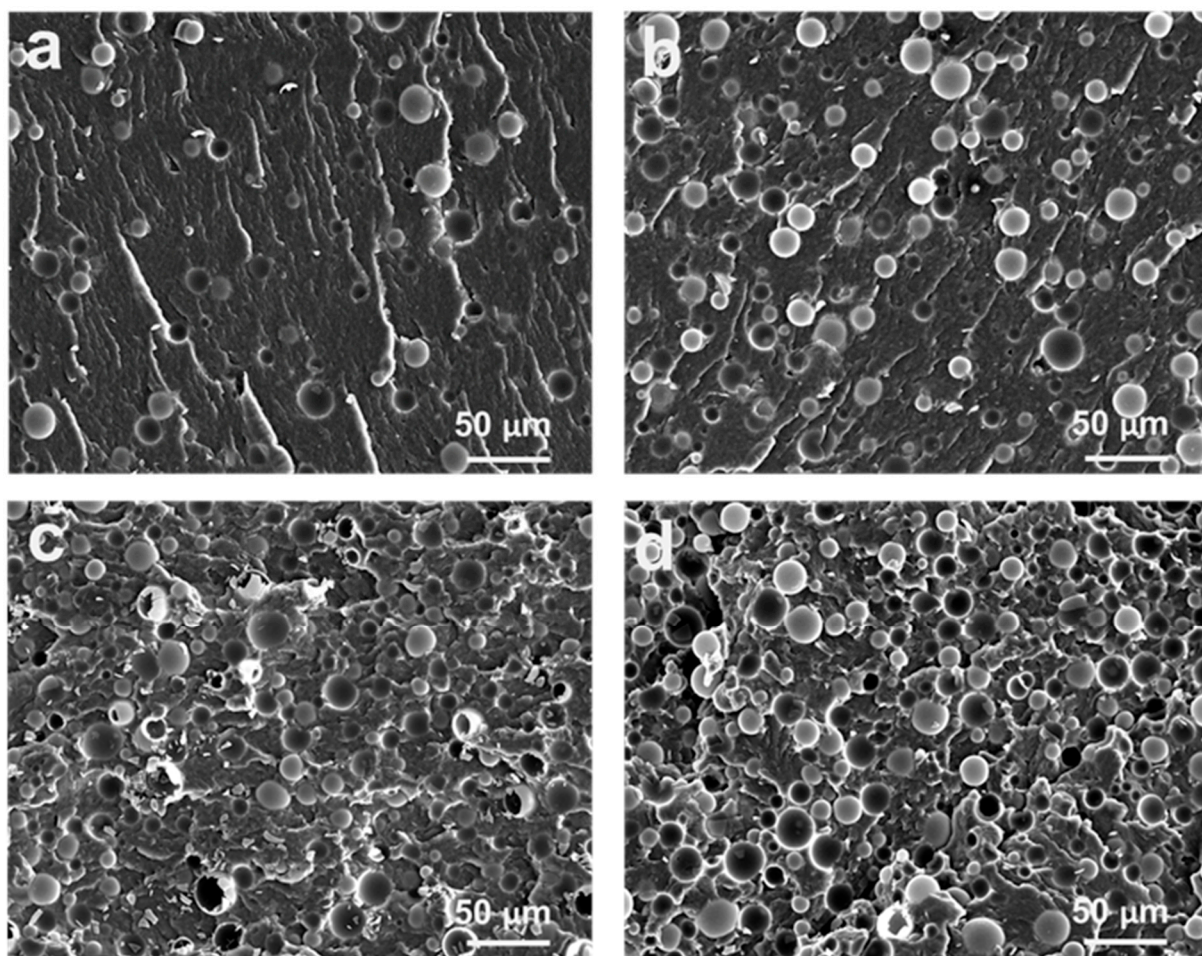

**Figure S4.** SEM microphotographs of syntactic foams on fractured surfaces after tensile test: PA 6/HGM 5 (a), PA 6/HGM 10 (b), PA 6/HGM 15 (c), and PA 6/HGM 20 (d).



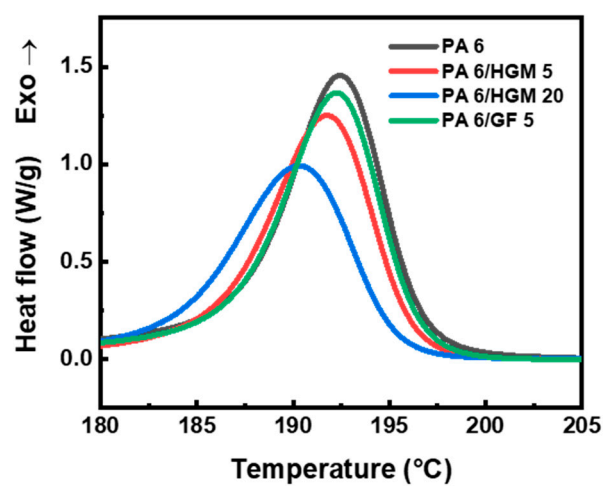

**Figure S5.** DSC thermograms of syntactic foams. The more the HGM was introduced, the lower the peak of crystallization temperature was found.

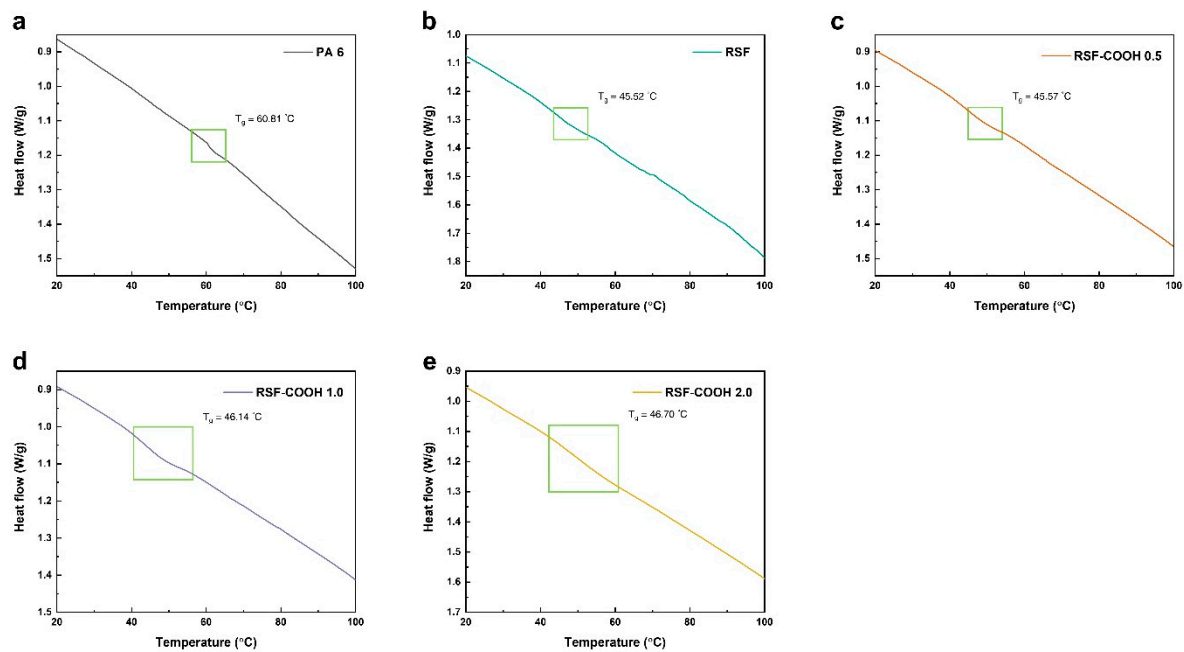

**Figure S6.** DSC thermograms ranging from 20 °C to 100 °C of the PA 6 (a), RSF (b), RSF-COOH 0.5 (c), RSF-COOH 1.0 (d), and RSF-COOH 2.0 (e) for the glass transition temperature ( $T_g$ ) evaluation.  $T_g$  of each sample is depicted in the plots.

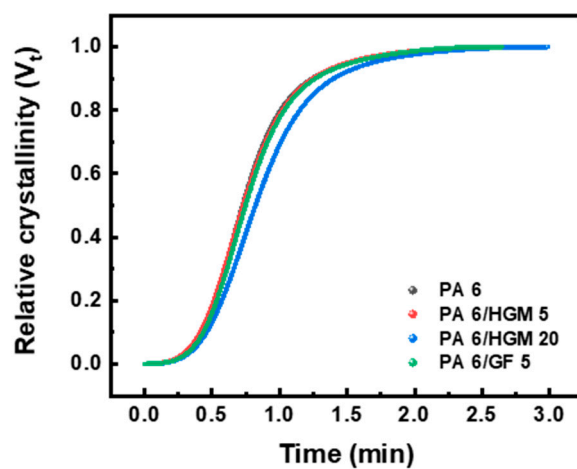

**Figure S7.** Plots of relative crystallinity ( $V_t$ ) vs time for the non-isothermal crystallization of neat PA 6, syntactic foams with different HGM contents, and reinforced PA 6 composites.

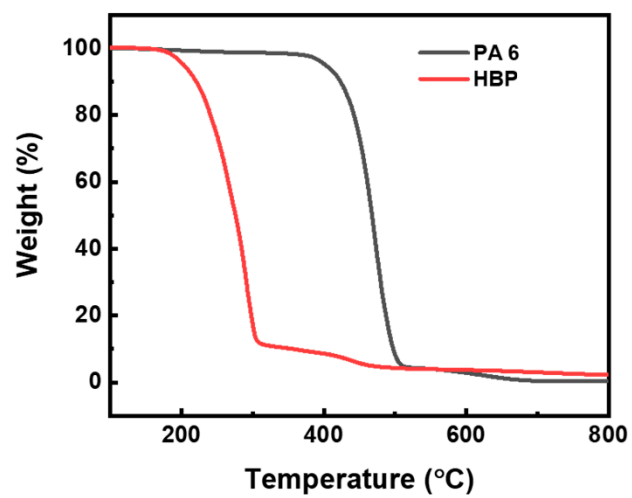

**Figure S8.** TGA thermograms of PA 6 and HBP.

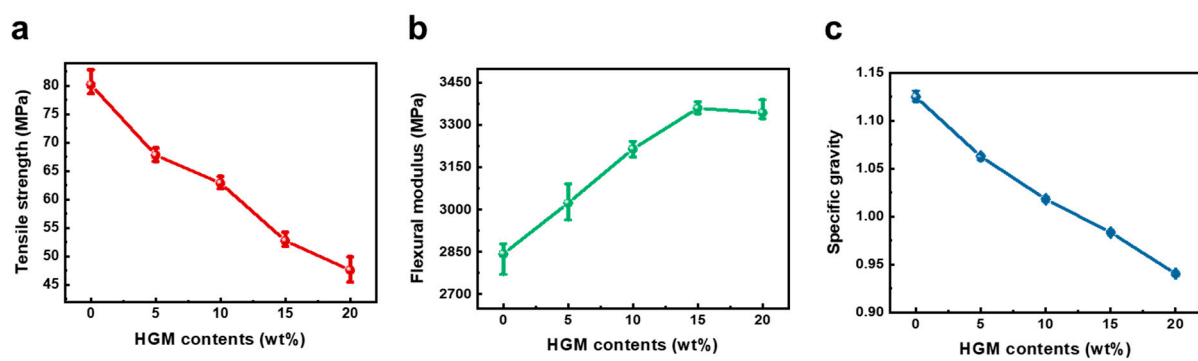

**Figure S9.** Tensile strength (a), flexural modulus (b), and specific gravity (c) of syntactic foams with various HGM contents.

$$\rho_{Inorganic\ ashes} = \frac{1}{\frac{W_{GF}}{\rho_{GF}} + \frac{W_{crushed\ HGM}}{\rho_{crushed\ HGM}}}$$

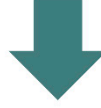

$$\% \text{ vol of HGM broken in process} = \left[ \frac{\left( \frac{1}{\rho_{HGM-input}} \right) - \left( \frac{1}{\rho_{crushed\ HGM}} \right)}{\left( \frac{1}{\rho_{HGM-input}} \right) - \left( \frac{1}{\rho_{HGM-100\% \text{ breakage}}} \right)} \right]$$

**Figure S10.** Equations for calculating HGM breakage. The density of HGMs reaches 2.54 g/cm<sup>3</sup> at 100% breakage. By exposing the pellets to 550 °C for 2 hrs to remove the matrix (PA 6), true densities of the residual inorganic ash consisting of HGMs and GFs were measured by gas pycnometer, which were 0.4365 and 2.4510 g/cm<sup>3</sup>, respectively.

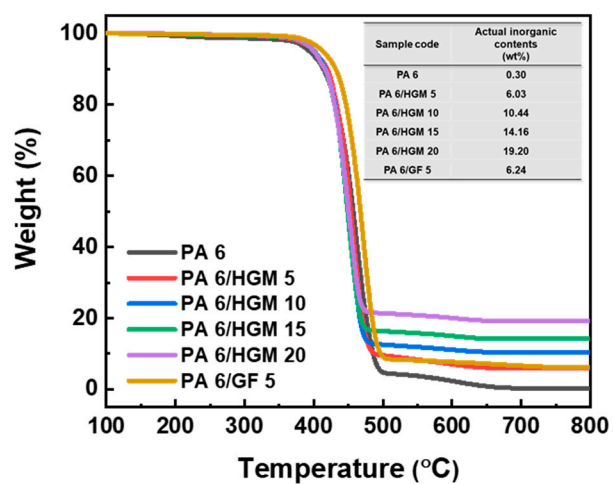

**Figure S11.** TGA thermograms of syntactic foams and a glass fiber reinforced PA 6 composite. Inset: actual inorganic filler contents.
